# Supplementary material for: Insights into mechanisms of diphosphine-mediated controlled surface construction on Au nanoclusters
Source: Royal Society of Chemistry journal article supplement (doi:10.1039/d2nr05291a), 2022-01-01
Supplement: d2nr05291a1.pdf [file d2nr05291a1.pdf]

## Supporting Information

### **Insights into mechanisms of diphosphine-mediated controlled surface construction on Au nanoclusters**

Qinzhen Li,<sup>a</sup> Sha Yang,<sup>b</sup> Jinsong Chai,<sup>b</sup> Hui Zhang<sup>\*a</sup> and Manzhou Zhu<sup>\*b</sup>

<sup>a</sup> School of Materials Science and Engineering, Anhui University, Hefei, Anhui 230601, China.

<sup>b</sup> Department of Chemistry and Centre for Atomic Engineering of Advanced Materials, Key Laboratory of Structure and Functional Regulation of Hybrid Materials of Ministry of Education, Institutes of Physical Science and Information Technology and Anhui Province Key Laboratory of Chemistry for Inorganic/Organic Hybrid Functionalized Materials, Anhui University, Hefei, Anhui 230601, China.

## 1. Supporting Figures

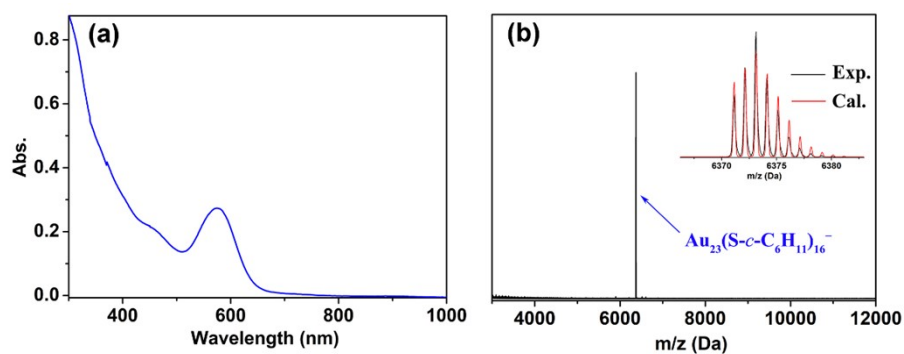

**Fig. S1** (a) UV-vis spectrum and (b) ESI-MS of  $\text{Au}_{23}(\text{SR})_{16}^-$ . Inset shows the experimental (black) and calculated (red) isotopic patterns of the main peak.

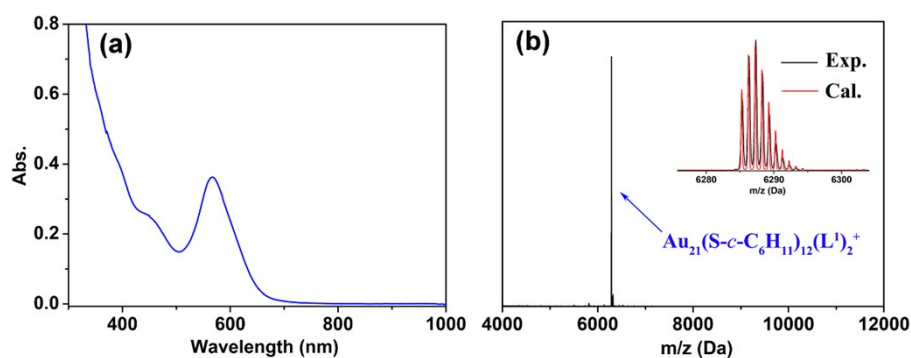

**Fig. S2** (a) UV-vis spectrum and (b) ESI-MS of  $\text{Au}_{21}\text{-L}^1$ . Inset shows the experimental (black) and calculated (red) isotopic patterns of the main peak.

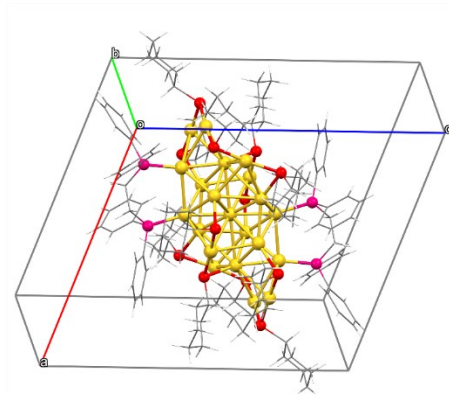

**Fig. S3** A unit cell of the  $\text{Au}_{21}\text{-L}^2$  crystal. (Labels: golden = Au; red = S; magenta = P; gray = C; white = H.)

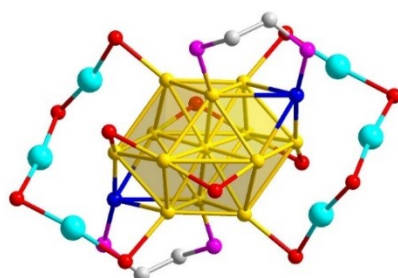

**Fig. S4** Crystal structure of  $\text{Au}_{21}\text{-L}^2$ . All of the H atoms and most of the carbon atoms are omitted. (Labels: sky blue, blue, golden = Au; red = S; magenta = P; gray = C.)

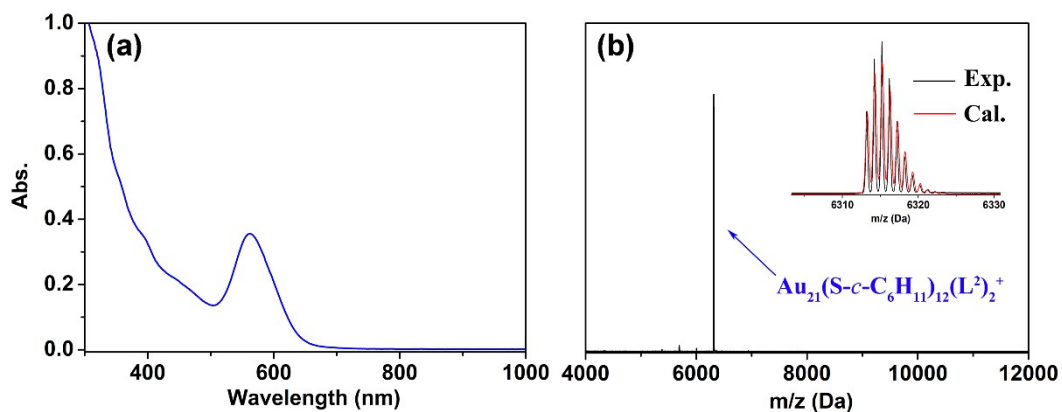

**Fig. S5** (a) UV-vis spectrum and (b) ESI-MS of  $\text{Au}_{21}\text{-L}^2$ . Inset shows the experimental (black) and calculated (red) isotopic patterns of the main peak.

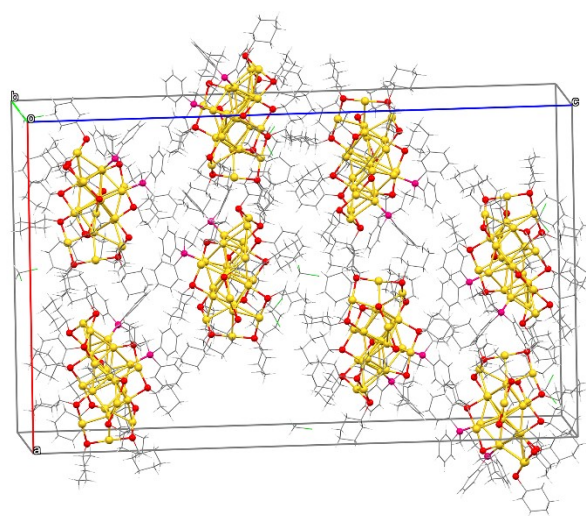

**Fig. S6** A unit cell of the  $\text{Au}_{22}\text{-L}^3$  crystal. (Labels: golden = Au; red = S; magenta = P; green = Cl; gray = C; white = H.)

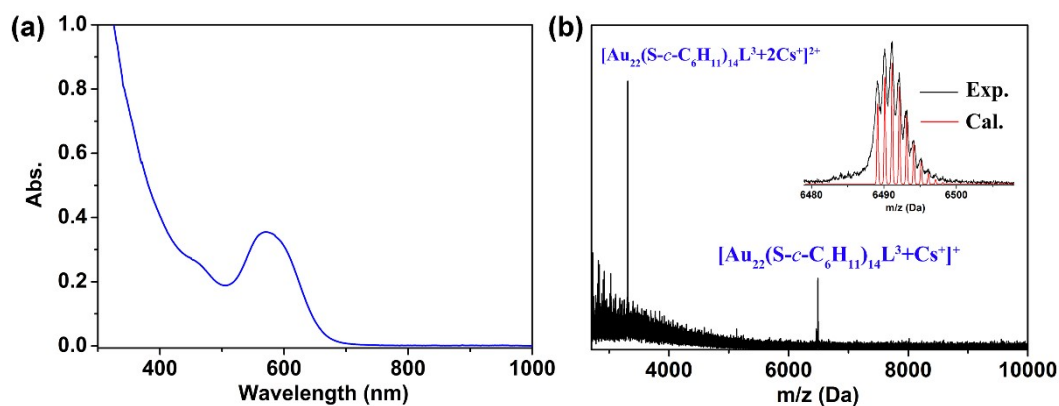

**Fig. S7** (a) UV-vis spectrum and (b) ESI-MS of  $\text{Au}_{22}\text{-L}^3$ . Inset shows the experimental (black) and calculated (red) isotopic patterns of the main peak. CsOAc was added to enhance the ionization of the neutral nanoclusters.

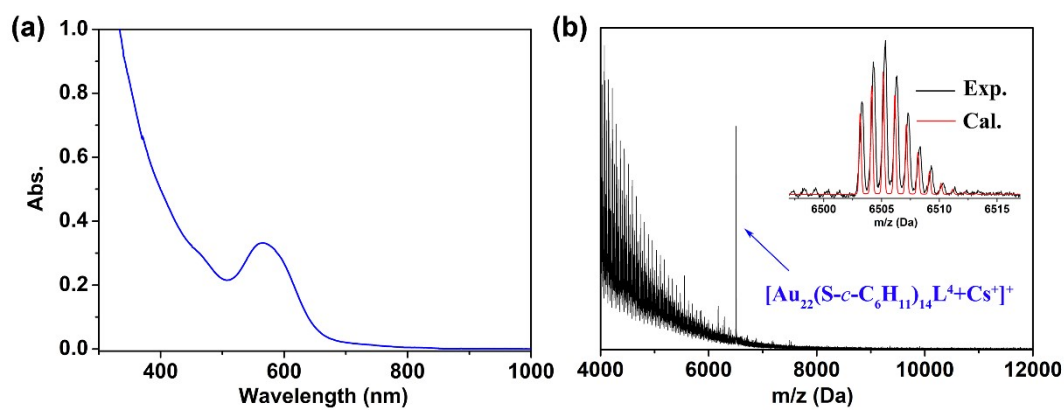

**Fig. S8** (a) UV-vis spectrum and (b) ESI-MS of  $\text{Au}_{22}\text{-L}^4$ . Inset shows the experimental (black) and calculated (red) isotopic patterns of the main peak. CsOAc was added to enhance the ionization of the neutral nanoclusters.

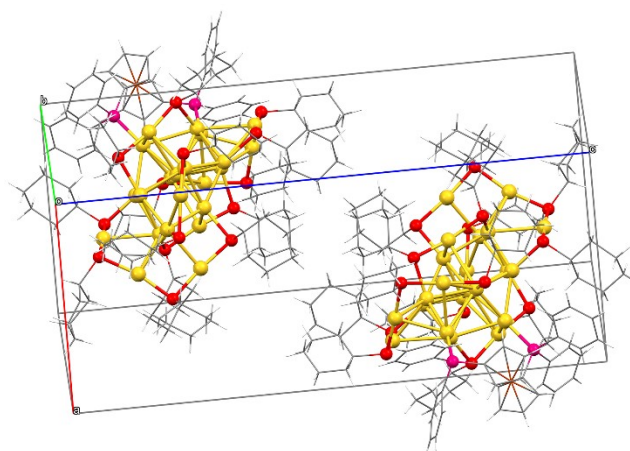

**Fig. S9** A unit cell of the  $\text{Au}_{22}\text{-DPPF}$  crystal. (Labels: golden = Au; red = S; magenta = P; gray = C; white = H.).

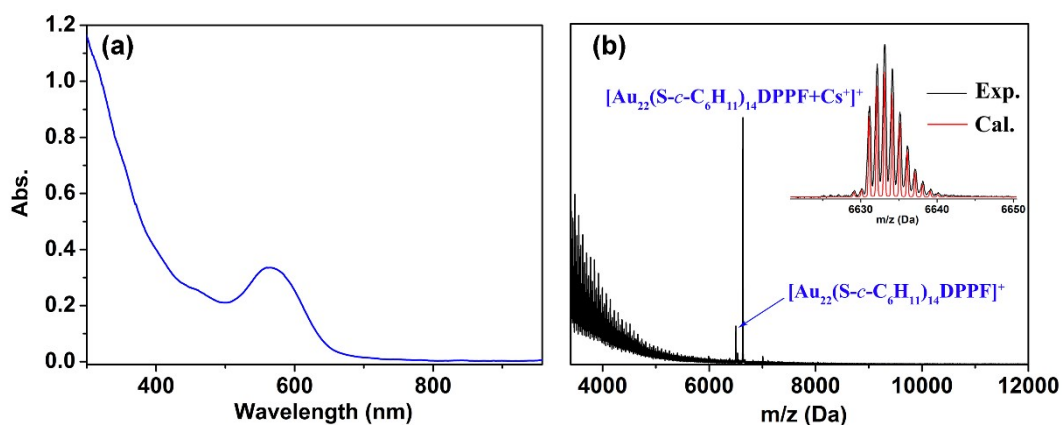

**Fig. S10** ESI-MS of  $\text{Au}_{22}\text{-DPPF}$ . Inset shows the experimental (black) and calculated (red) isotopic patterns of the main peak.

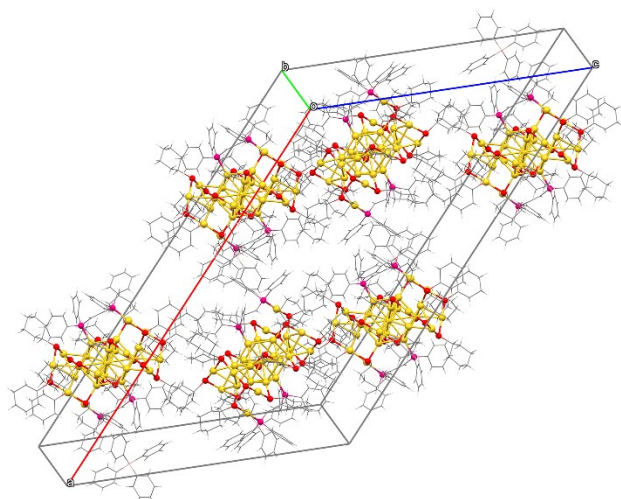

**Fig. S11** A unit cell of the  $\text{Au}_{25}\text{-TDPE}$  crystal. (Labels: golden = Au; red = S; magenta = P; gray = C; white = H.).

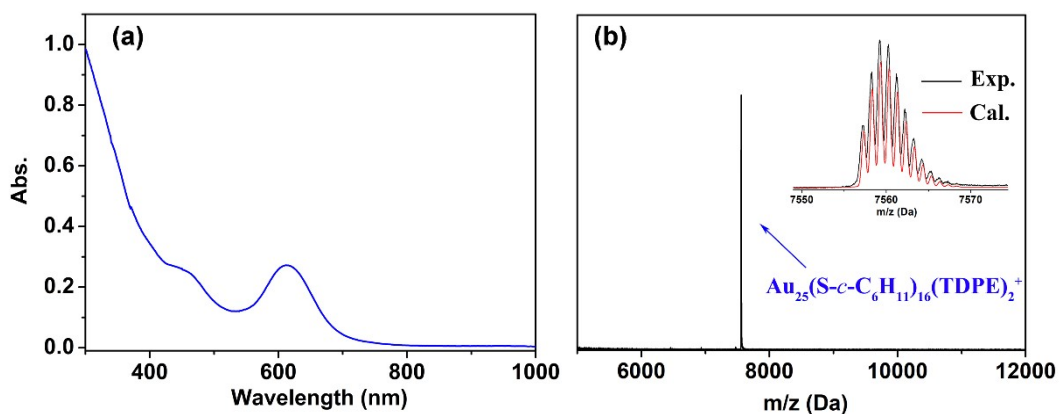

**Fig. S12** (a) UV-vis spectrum and (b) ESI-MS of  $\text{Au}_{25}\text{-TDPE}$ . Inset shows the experimental (black) and calculated (red) isotopic patterns of the main peak.

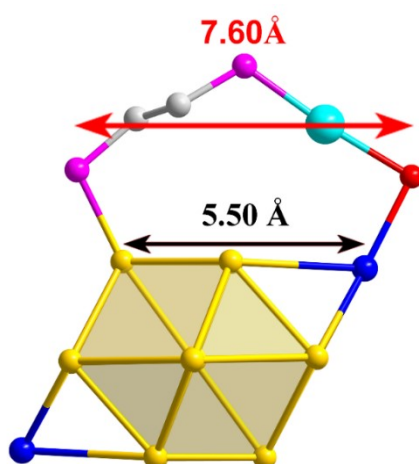

**Fig. S13** The P-S distance (indicated with red arrow) and Au-Au distance (indicated with black arrow) at the binding site of TDPE in the  $\text{Au}_{25}\text{-TDPE}$ . (Labels: sky blue, blue, golden = Au; red = S; magenta = P; gray = C.)

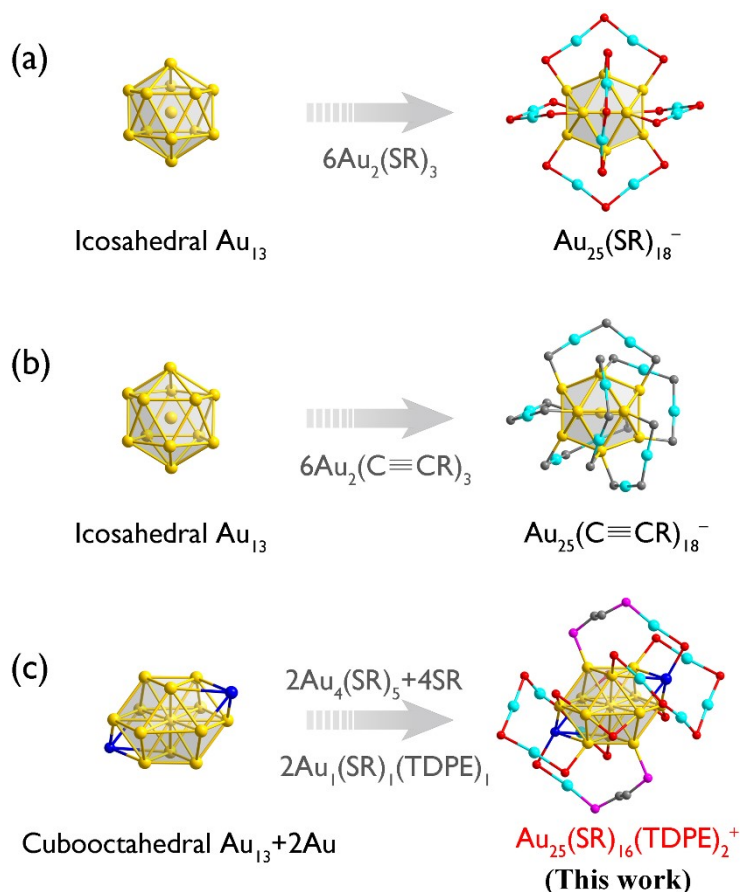

**Fig. S14** Comparison of the inner cores and structural frameworks of three  $\text{Au}_{25}$  nanoclusters exhibiting  $8 e^-$ . (a)  $\text{Au}_{25}(\text{SR})_{18}^-$  consisted of an icosahedral  $\text{Au}_{13}$  kernel and six  $\text{Au}_2(\text{SR})_3$  motifs;<sup>2,3</sup> (b)  $\text{Au}_{25}(\text{C}\equiv\text{CR})_{18}^-$  consisted of an icosahedral  $\text{Au}_{13}$  kernel and six  $\text{Au}_2(\text{C}\equiv\text{CR})_3$  motifs (For showing the surface motifs more clearly, one of the carbon atoms in the alkyne group is omitted);<sup>4</sup> (c)  $\text{Au}_{25}(\text{SR})_{16}(\text{TDPE})_2^+$  consisted of a  $\text{Au}_{15}$  kernel (cubooctahedral  $\text{Au}_{13}$  added with two gold atoms) two  $\text{Au}_4(\text{SR})_5$ , four bridging  $-\text{SR}$  and two  $\text{Au}_1(\text{SR})_1(\text{TDPE})_1$  motifs. (Labels: sky blue, blue, golden = Au; red = S; magenta = P; gray = C.)

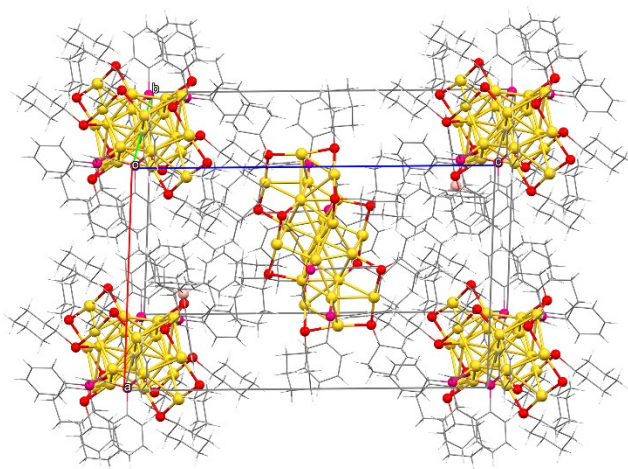

**Fig. S15** A unit cell of the  $\text{Au}_{21}$ -CDPE crystal. (Labels: golden = Au; red = S; magenta = P; gray = C; white = H.)

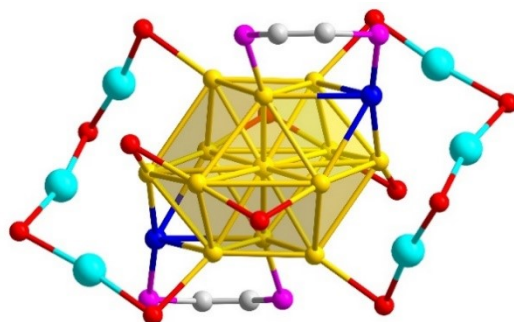

**Fig. S16** Crystal structure of  $\text{Au}_{21}\text{-CDPE}$ . All of the H atoms and most of the carbon atoms are omitted. (Labels: sky blue, blue, golden = Au; red = S; magenta = P; gray = C.)

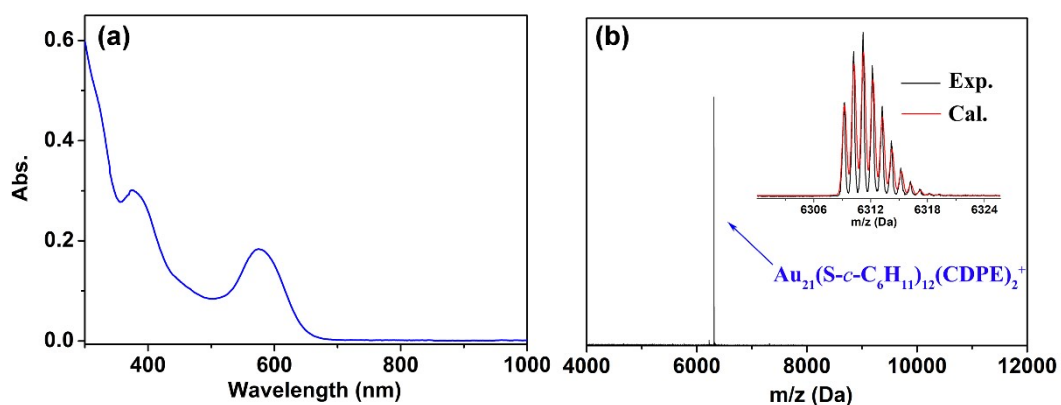

**Fig. S17** (a) UV-vis spectrum and (b) ESI-MS of  $\text{Au}_{21}\text{-CDPE}$ . Inset shows the experimental (black) and calculated (red) isotopic patterns of the main peak.

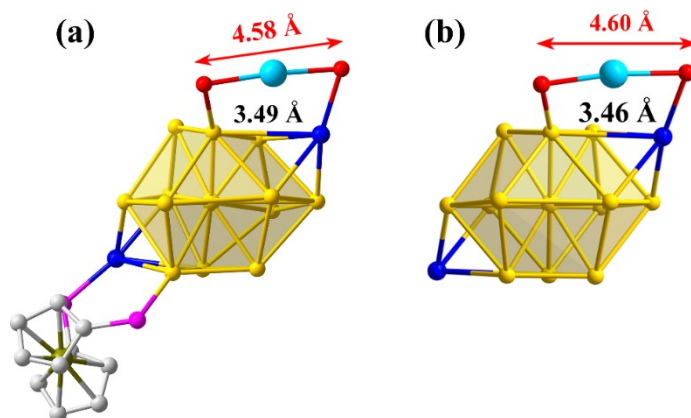

**Fig. S18** Comparison of the S-S distance and Au-Au distance at the  $\text{Au}_1\text{S}_2$  binding site in (a)  $\text{Au}_{22}\text{-DPPF}$  and (b)  $\text{Au}_{23}(\text{SR})_{16}^-$ . (Labels: sky blue, blue, golden = Au; red = S; magenta = P; olive = Fe, gray = C.)

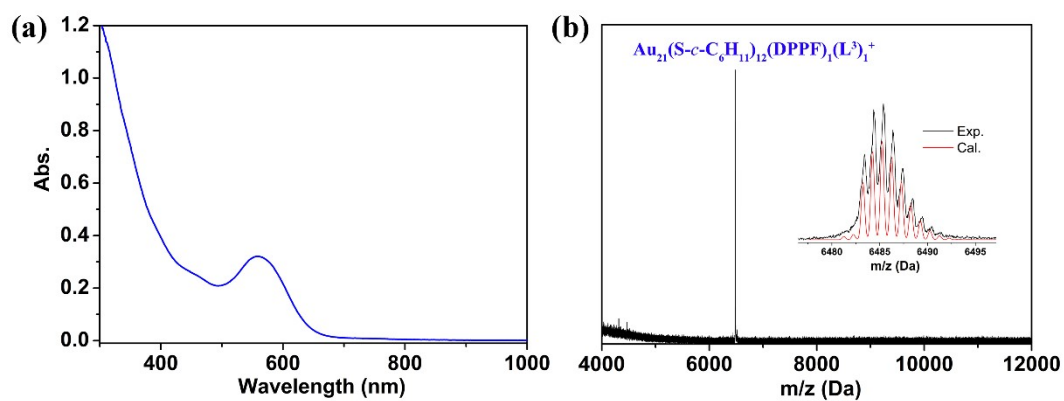

**Fig. S19** (a) UV-vis spectrum of  $\text{Au}_{21}\text{-DPPF-L}^3$  (b) ESI-MS of  $\text{Au}_{21}\text{-DPPF-L}^3$ . Inset shows the experimental (black) and calculated (red) isotopic patterns of the main peak.

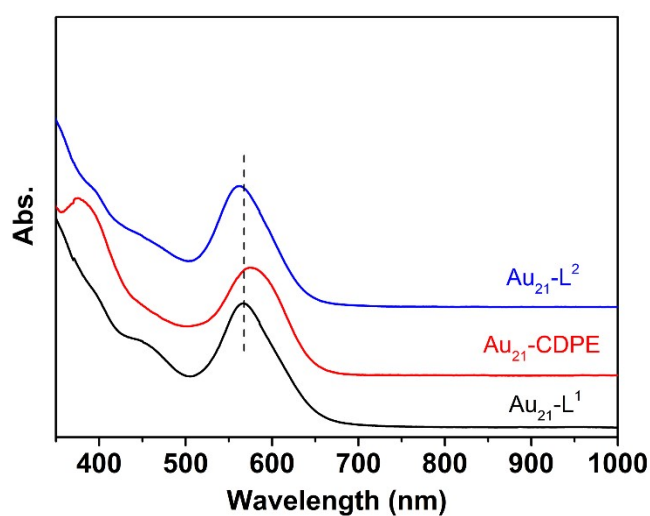

**Fig. S20** UV-vis spectra of  $\text{Au}_{21}\text{-L}^1$ ,  $\text{Au}_{21}\text{-CDPE}$  and  $\text{Au}_{21}\text{-L}^2$ . The dash line indicates the position of the absorption wavelength of  $\text{Au}_{21}\text{-L}^1$ .

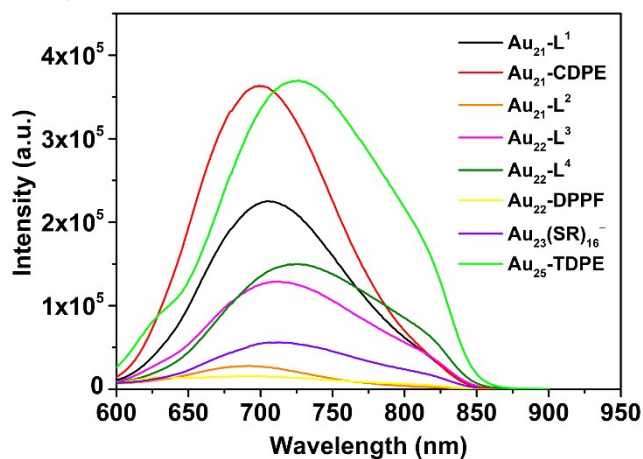

**Fig. S21** Comparison of the photoluminescence of different Au NCs.



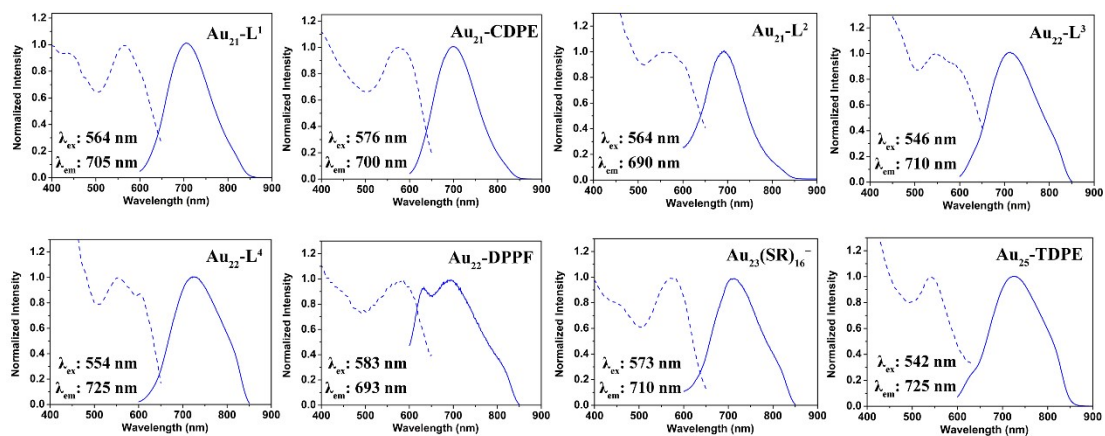

**Fig. S22** Excitation spectra (dash line) and emission spectra (solid line) of the Au NCs in this study. ( $\lambda_{\text{ex}}$ : excitation wavelength;  $\lambda_{\text{em}}$ : emission wavelength)

## 2. Supporting Tables

Table S1. Crystal data and structure refinement for **Au<sub>21</sub>-L<sup>2</sup>**.

|                                             |                                                                                   |
|---------------------------------------------|-----------------------------------------------------------------------------------|
| CCDC code                                   | 2119766                                                                           |
| Empirical formula                           | C <sub>124</sub> H <sub>180</sub> Au <sub>21</sub> P <sub>4</sub> S <sub>12</sub> |
| Formula weight                              | 6315.57                                                                           |
| Temperature/K                               | 150                                                                               |
| Crystal system                              | triclinic                                                                         |
| Space group                                 | P-1                                                                               |
| a/Å                                         | 15.4160(9)                                                                        |
| b/Å                                         | 15.9669(11)                                                                       |
| c/Å                                         | 19.0841(12)                                                                       |
| α/°                                         | 111.495(5)                                                                        |
| β/°                                         | 112.712(5)                                                                        |
| γ/°                                         | 93.327(5)                                                                         |
| Volume/Å <sup>3</sup>                       | 3921.4(5)                                                                         |
| Z                                           | 1                                                                                 |
| ρ <sub>calc</sub> /cm <sup>3</sup>          | 2.674                                                                             |
| μ/mm <sup>-1</sup>                          | 38.030                                                                            |
| F(000)                                      | 2835.0                                                                            |
| Crystal size/mm <sup>3</sup>                | 0.1 × 0.05 × 0.02                                                                 |
| Radiation                                   | CuKα (λ = 1.54186)                                                                |
| 2θ range for data collection/°              | 8.216 to 129.996                                                                  |
| Index ranges                                | -8 ≤ h ≤ 18, -16 ≤ k ≤ 18, -22 ≤ l ≤ 19                                           |
| Reflections collected                       | 25826                                                                             |
| Independent reflections                     | 12772 [R <sub>int</sub> = 0.0556, R <sub>sigma</sub> = 0.0792]                    |
| Data/restraints/parameters                  | 12772/373/727                                                                     |
| Goodness-of-fit on F <sup>2</sup>           | 0.930                                                                             |
| Final R indexes [I ≥ 2σ (I)]                | R <sub>1</sub> = 0.0607, wR <sub>2</sub> = 0.1467                                 |
| Final R indexes [all data]                  | R <sub>1</sub> = 0.0767, wR <sub>2</sub> = 0.1524                                 |
| Largest diff. peak/hole / e Å <sup>-3</sup> | 3.19/-4.59                                                                        |

Table S2. Crystal data and structure refinement for **Au<sub>22</sub>-L<sup>3</sup>**.

|                   |                                                                                                   |
|-------------------|---------------------------------------------------------------------------------------------------|
| CCDC code         | 2119770                                                                                           |
| Empirical formula | C <sub>112</sub> H <sub>182</sub> Au <sub>22</sub> Cl <sub>2</sub> P <sub>2</sub> S <sub>14</sub> |
| Formula weight    | 6443.51                                                                                           |
| Temperature/K     | 120                                                                                               |
| Crystal system    | orthorhombic                                                                                      |
| Space group       | Pca2 <sub>1</sub>                                                                                 |
| a/Å               | 33.411                                                                                            |
| b/Å               | 16.475                                                                                            |

|                                               |                                                                |
|-----------------------------------------------|----------------------------------------------------------------|
| $c/\text{\AA}$                                | 54.849                                                         |
| $\alpha/^\circ$                               | 90                                                             |
| $\beta/^\circ$                                | 90                                                             |
| $\gamma/^\circ$                               | 90                                                             |
| Volume/ $\text{\AA}^3$                        | 30191.6                                                        |
| Z                                             | 8                                                              |
| $\rho_{\text{calc}}/\text{cm}^3$              | 2.835                                                          |
| $\mu/\text{mm}^{-1}$                          | 41.649                                                         |
| F(000)                                        | 23040.0                                                        |
| Crystal size/ $\text{mm}^3$                   | $0.1 \times 0.1 \times 0.01$                                   |
| Radiation                                     | CuK $\alpha$ ( $\lambda = 1.54186$ )                           |
| $2\Theta$ range for data collection/ $^\circ$ | 7.708 to 119.99                                                |
| Index ranges                                  | $-15 \leq h \leq 37, -18 \leq k \leq 15, -31 \leq l \leq 61$   |
| Reflections collected                         | 54187                                                          |
| Independent reflections                       | 28723 [ $R_{\text{int}} = 0.0799, R_{\text{sigma}} = 0.0750$ ] |
| Data/restraints/parameters                    | 28723/2873/2642                                                |
| Goodness-of-fit on $F^2$                      | 1.047                                                          |
| Final R indexes [ $I \geq 2\sigma(I)$ ]       | $R_1 = 0.1146, wR_2 = 0.2797$                                  |
| Final R indexes [all data]                    | $R_1 = 0.1443, wR_2 = 0.3253$                                  |
| Largest diff. peak/hole / $e \text{\AA}^{-3}$ | 5.67/-3.10                                                     |

Table S3. Crystal data and structure refinement for **Au<sub>22</sub>-DPPF**.

|                                  |                                                                                  |
|----------------------------------|----------------------------------------------------------------------------------|
| CCDC code                        | 2119769                                                                          |
| Empirical formula                | $\text{C}_{120}\text{H}_{186}\text{Au}_{22}\text{Cl}_4\text{FeP}_2\text{S}_{14}$ |
| Formula weight                   | 6670.37                                                                          |
| Temperature/K                    | 120                                                                              |
| Crystal system                   | triclinic                                                                        |
| Space group                      | P-1                                                                              |
| $a/\text{\AA}$                   | 15.8416(5)                                                                       |
| $b/\text{\AA}$                   | 17.5548(5)                                                                       |
| $c/\text{\AA}$                   | 29.6424(8)                                                                       |
| $\alpha/^\circ$                  | 80.682(2)                                                                        |
| $\beta/^\circ$                   | 82.909(2)                                                                        |
| $\gamma/^\circ$                  | 63.942(2)                                                                        |
| Volume/ $\text{\AA}^3$           | 7295.0(4)                                                                        |
| Z                                | 2                                                                                |
| $\rho_{\text{calc}}/\text{cm}^3$ | 3.037                                                                            |
| $\mu/\text{mm}^{-1}$             | 44.222                                                                           |
| F(000)                           | 5984.0                                                                           |
| Crystal size/ $\text{mm}^3$      | $0.05 \times 0.05 \times 0.01$                                                   |

|                                                |                                                                |
|------------------------------------------------|----------------------------------------------------------------|
| Radiation                                      | CuK $\alpha$ ( $\lambda = 1.54186$ )                           |
| 2 $\Theta$ range for data collection/ $^\circ$ | 7.766 to 129.996                                               |
| Index ranges                                   | $-18 \leq h \leq 18, -13 \leq k \leq 20, -34 \leq l \leq 34$   |
| Reflections collected                          | 49548                                                          |
| Independent reflections                        | 23672 [ $R_{\text{int}} = 0.0844, R_{\text{sigma}} = 0.1039$ ] |
| Data/restraints/parameters                     | 23672/849/1486                                                 |
| Goodness-of-fit on $F^2$                       | 0.950                                                          |
| Final R indexes [ $I \geq 2\sigma(I)$ ]        | $R_1 = 0.0679, wR_2 = 0.1725$                                  |
| Final R indexes [all data]                     | $R_1 = 0.1018, wR_2 = 0.1891$                                  |
| Largest diff. peak/hole / e $\text{\AA}^{-3}$  | 3.02/-2.67                                                     |

Table S4. Crystal data and structure refinement for **Au<sub>25</sub>-TDPE**.

|                                                |                                                                                    |
|------------------------------------------------|------------------------------------------------------------------------------------|
| CCDC code                                      | 2119767                                                                            |
| Empirical formula                              | C <sub>172</sub> H <sub>240</sub> Au <sub>25</sub> BP <sub>4</sub> S <sub>16</sub> |
| Formula weight                                 | 7879.44                                                                            |
| Temperature/K                                  | 120                                                                                |
| Crystal system                                 | monoclinic                                                                         |
| Space group                                    | C2/c                                                                               |
| a/ $\text{\AA}$                                | 49.7888(10)                                                                        |
| b/ $\text{\AA}$                                | 17.4433(4)                                                                         |
| c/ $\text{\AA}$                                | 31.9121(9)                                                                         |
| $\alpha/^\circ$                                | 90                                                                                 |
| $\beta/^\circ$                                 | 129.254(2)                                                                         |
| $\gamma/^\circ$                                | 90                                                                                 |
| Volume/ $\text{\AA}^3$                         | 21461.1(10)                                                                        |
| Z                                              | 4                                                                                  |
| $\rho_{\text{calc}}/\text{g/cm}^3$             | 2.439                                                                              |
| $\mu/\text{mm}^{-1}$                           | 33.236                                                                             |
| F(000)                                         | 14272.0                                                                            |
| Crystal size/ $\text{mm}_3$                    | $0.1 \times 0.05 \times 0.02$                                                      |
| Radiation                                      | CuK $\alpha$ ( $\lambda = 1.54186$ )                                               |
| 2 $\Theta$ range for data collection/ $^\circ$ | 12.394 to 139.308                                                                  |
| Index ranges                                   | $-55 \leq h \leq 60, -12 \leq k \leq 21, -35 \leq l \leq 38$                       |
| Reflections collected                          | 44862                                                                              |
| Independent reflections                        | 19420 [ $R_{\text{int}} = 0.0587, R_{\text{sigma}} = 0.1037$ ]                     |
| Data/restraints/parameters                     | 19420/707/952                                                                      |
| Goodness-of-fit on $F^2$                       | 0.872                                                                              |
| Final R indexes [ $I \geq 2\sigma(I)$ ]        | $R_1 = 0.0447, wR_2 = 0.0986$                                                      |
| Final R indexes [all data]                     | $R_1 = 0.0819, wR_2 = 0.1152$                                                      |
| Largest diff. peak/hole / e $\text{\AA}^{-3}$  | 2.30/-1.77                                                                         |

Table S5. Crystal data and structure refinement for **Au<sub>21</sub>-CDPE**.

|                                             |                                                                                    |
|---------------------------------------------|------------------------------------------------------------------------------------|
| CCDC code                                   | 2119768                                                                            |
| Empirical formula                           | C <sub>148</sub> H <sub>196</sub> Au <sub>21</sub> BP <sub>4</sub> S <sub>12</sub> |
| Formula weight                              | 6630.74                                                                            |
| Temperature/K                               | 120                                                                                |
| Crystal system                              | triclinic                                                                          |
| Space group                                 | P-1                                                                                |
| a/Å                                         | 17.4996(2)                                                                         |
| b/Å                                         | 21.3266(3)                                                                         |
| c/Å                                         | 26.0965(4)                                                                         |
| α/°                                         | 69.4100(10)                                                                        |
| β/°                                         | 83.6220(10)                                                                        |
| γ/°                                         | 74.5830(10)                                                                        |
| Volume/Å <sup>3</sup>                       | 8787.5(2)                                                                          |
| Z                                           | 2                                                                                  |
| ρ <sub>calc</sub> /cm <sup>3</sup>          | 2.506                                                                              |
| μ/mm <sup>-1</sup>                          | 33.992                                                                             |
| F(000)                                      | 6000.0                                                                             |
| Crystal size/mm <sup>3</sup>                | 0.05 × 0.05 × 0.04                                                                 |
| Radiation                                   | CuKα (λ = 1.54186)                                                                 |
| 2θ range for data collection/°              | 9.138 to 124.998                                                                   |
| Index ranges                                | -20 ≤ h ≤ 9, -24 ≤ k ≤ 24, -28 ≤ l ≤ 30                                            |
| Reflections collected                       | 49686                                                                              |
| Independent reflections                     | 26740 [R <sub>int</sub> = 0.0399, R <sub>sigma</sub> = 0.0392]                     |
| Data/restraints/parameters                  | 26740/1195/1666                                                                    |
| Goodness-of-fit on F <sup>2</sup>           | 1.034                                                                              |
| Final R indexes [I >= 2σ (I)]               | R <sub>1</sub> = 0.0637, wR <sub>2</sub> = 0.1766                                  |
| Final R indexes [all data]                  | R <sub>1</sub> = 0.0712, wR <sub>2</sub> = 0.1865                                  |
| Largest diff. peak/hole / e Å <sup>-3</sup> | 4.42/-4.85                                                                         |

### 3. References

1. M. Zhu, C. M. Aikens, F. J. Hollander, G. C. Schatz and R. Jin, *J. Am. Chem. Soc.*, 2008, **130**, 5883.
2. M. W. Heaven, A. Dass, P. S. White, K. M. Holt and R. W. Murray, *J. Am. Chem. Soc.*, 2008, **130**, 3754.
3. J.-J. Li, Z.-J. Guan, Z. Lei, F. Hu and Q.-M. Wang, *Angew. Chem., Int. Ed.*, 2019, **58**, 1083.
